# Supplementary material
Source: Springer Nature journal article supplement (https://www.springermedizin.de/resource/supplementary/12943_2007_308_MOESM5_ESM.pdf/9553892)

**A**

1 2 3 4 5 6

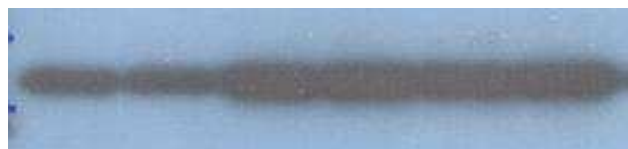← **Bax, 23 kDa****B**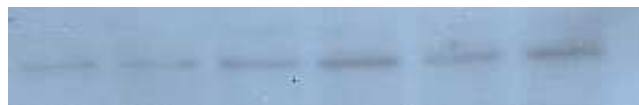**C**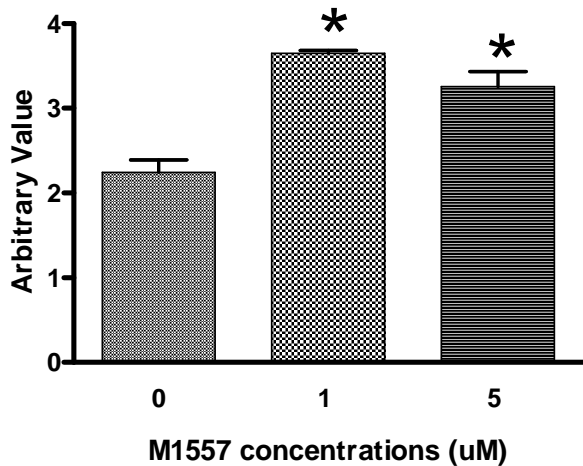

Supplement: MOESM5 [file 9553892]
